# Supplementary material
Source: publisher site journal article supplement (https://www.dovepress.com/article/506582)
Supplement: Supplementary file 1 [file get_supplementary_file.php]

Supplementary Materials

Supplementary Table. 1 Primer sequence

| **Gene_name** | **Forward_ primer** | **Reverse_ primer** |
| --- | --- | --- |
| EP300 | GTTCCTTCCTCAGACTCAGTTC | CATTATAGGAGAGTTCACCGGG |
| CTCF | TTAAAACGTCACATTCGCTCTC | TCATAAGGCTTTTCCCCTGAAT |
| RAD21 | GGAAATACCACCTGTAGAGCTT | TCTGGCAGAAGTTCTAACTCTG |
| REST | CTGAAGAACAGTTTGTGCATCA | CTCACTGTTGTGTATGTGCAAA |
| GABPA | TTAAACCTGCGGACACTGTTG | GTATCCCAAGGCGTTCTTGTT |
| TAF1 | AAGATTTATCGCACGTTTCGAG | CATCTTTTGTAGTCCGTATGCG |
| SIN3A | CAGCTACGTCTCAAAGAACCTA | GCATGAATGGTGAACATCTCTC |
| HDAC2 | AAAGTCTGCTACTACTACGACG | TTATGGGTCATGCGGATTCTAT |
| SP1 | TCACTCCATGGATGAAATGACA | CAGAGGAGGAAGAGATGATCTG |
| YY1 | ACGGCTTCGAGGATCAGATTC | TGACCAGCGTTTGTTCAATGT |
| TAOK1 | ATGCCATCAACTAACAGAGCAG | CGCACATCTCGTGCAAAATAC |
| GAPDH | TGAACGGGAAGCTCACTGG | GCTTCACCTTCTTGATGTC |

Supplementary Table. 2 siRNA sequence of TAOK1

| **Name** | **Oligo name** | **Forward_ primer** | **Reverse_ primer** |
| --- | --- | --- | --- |
| NC | negative control | UUCUCCGAACGUGUCACGUTT | ACGUGACACGUUCGGAGAATT |
| Si-1 | TAOK1-225 | GGAAGUCAAGUUUCUACAAAGTT | CUUUGUAGAAACUUGACUUCCTT |
| Si-2 | TAOK1-1268 | CCCAAGUAUCUCGUCACAAAUTT | AUUUGUGACGAGAUACUUGGGTT |
| Si-3 | TAOK1-2957 | CGAGUGUCACUUCACAAAUAUTT | AUAUUUGUGAAGUGACACUCGTT |

Supplementary Table. 3 Analysis of differences of TAOK1 in different tumor types based on TCGA

| **Type** | **logFC** | **P.Value** | **adj.P.Val** | **sig** |
| --- | --- | --- | --- | --- |
| BRCA | -0.360638159 | 0.000149685 | 0.000149685 | DOWN |
| KIRC | -0.35906935 | 0.000108735 | 0.000108735 | DOWN |
| PRAD | -0.358515121 | 0.004881662 | 0.004881662 | DOWN |
| THCA | -0.292792572 | 0.002113424 | 0.002113424 | DOWN |
| KICH | -0.953345758 | 1.65E-06 | 1.65E-06 | DOWN |
| BLCA | -0.088009621 | 0.635661665 | 0.635661665 | NO |
| THYM | -0.951410084 | 0.18458287 | 0.18458287 | NO |
| KIRP | 0.067029066 | 0.664927784 | 0.664927784 | NO |
| SKCM | 0.433474627 | 0.673188019 | 0.673188019 | NO |
| LUAD | -0.01994726 | 0.826922876 | 0.826922876 | NO |
| SARC | 0.788261832 | 0.230214801 | 0.230214801 | NO |
| LUSC | -0.057512008 | 0.569463217 | 0.569463217 | NO |
| UCEC | -0.570740416 | 0.052117251 | 0.052117251 | NO |
| PAAD | -0.082391341 | 0.828535529 | 0.828535529 | NO |
| PCPG | 0.415697436 | 0.32920881 | 0.32920881 | NO |
| CESC | 0.061682353 | 0.892735346 | 0.892735346 | NO |
| READ | -0.090986957 | 0.688255265 | 0.688255265 | NO |
| ESCA | 0.853157143 | 0.000158913 | 0.000158913 | UP |
| STAD | 0.806444686 | 2.74E-09 | 2.74347E-09 | UP |
| HNSC | 0.444772885 | 0.001090602 | 0.001090602 | UP |
| COAD | 0.224495469 | 0.023712176 | 0.023712176 | UP |
| LIHC | 0.860571655 | 5.44E-11 | 5.44E-11 | UP |
| CHOL | 1.937413889 | 4.06001E-09 | 4.06001E-09 | UP |

Supplementary Table. 4 Study the differences of TAOK1 in different tumor types based on TCGA and GTEx

| **Type** | **logFC** | **P.Value** | **adj.P.Val** | **sig** |
| --- | --- | --- | --- | --- |
| OV | -0.924742405 | 6.72E-17 | 6.72E-17 | DOWN |
| UCEC | -1.036326098 | 1.12E-18 | 1.12E-18 | DOWN |
| UCS | -1.089079082 | 2.90E-18 | 2.90E-18 | DOWN |
| ACC | -0.446336719 | 0.003668943 | 0.003668943 | DOWN |
| THCA | -0.290632272 | 3.34E-08 | 3.34E-08 | DOWN |
| LUAD | -0.29203689 | 2.86E-08 | 2.86E-08 | DOWN |
| LUSC | -0.333923014 | 8.28E-10 | 8.28E-10 | DOWN |
| SKCM | -0.485993639 | 2.07E-28 | 2.07E-28 | DOWN |
| PRAD | -0.225232226 | 0.003065958 | 0.003065958 | DOWN |
| TGCT | -0.711010823 | 1.69E-26 | 1.69E-26 | DOWN |
| CESC | -0.601625339 | 0.006878881 | 0.006878881 | DOWN |
| BRCA | -0.010109336 | 0.867140863 | 0.867140863 | NO |
| COAD | -0.016865413 | 0.854789836 | 0.854789836 | NO |
| READ | -0.118784784 | 0.467471505 | 0.467471505 | NO |
| DLBC | 0.405813887 | 0.062934892 | 0.062934892 | NO |
| KICH | 0.038406318 | 0.888449412 | 0.888449412 | NO |
| BLCA | -0.287130862 | 0.062309711 | 0.062309711 | NO |
| SARC | 0.788261832 | 0.230214801 | 0.230214801 | NO |
| PCPG | 0.415697436 | 0.32920881 | 0.32920881 | NO |
| LGG | 1.461865446 | 7.75E-133 | 7.75E-133 | UP |
| GBM | 0.720194464 | 1.12E-14 | 1.12E-14 | UP |
| PAAD | 1.864468601 | 4.87E-45 | 4.87E-45 | UP |
| ESCA | 0.94970153 | 3.13E-26 | 3.13E-26 | UP |
| STAD | 1.233208813 | 2.04E-39 | 2.04E-39 | UP |
| THYM | 0.992752696 | 8.32E-12 | 8.32E-12 | UP |
| LIHC | 0.443813905 | 8.14E-09 | 8.14E-09 | UP |
| KIRC | 0.259867539 | 0.013044037 | 0.013044037 | UP |
| KIRP | 0.867700732 | 5.08E-08 | 5.08E-08 | UP |
| LAML | 1.461982824 | 1.30E-45 | 1.30E-45 | UP |
| CHOL | 1.937413889 | 4.06E-09 | 4.06E-09 | UP |
| HNSC | 0.444772885 | 0.001090602 | 0.001090602 | UP |

Supplementary Table. 5 The results of paired t-test in 18 different tumor types

| **Type** | **P value** | **Type** | **P value** | **Type** | **P value** |
| --- | --- | --- | --- | --- | --- |
| BLCA | p = 0.047 | KICH | p = 0.028 | PAAD | p = 0.846 |
| BRCA | p < 0.001 | KIRC | p < 0.001 | PRAD | p = 0.87 |
| CHOL | p < 0.001 | KIRP | p = 0.017 | READ | p = 0.478 |
| COAD | p = 0.001 | LIHC | p = 0.002 | STAD | p = 0.086 |
| ESCA | p = 0.004 | LUAD | p = 0.225 | THCA | p = 0.017 |
| HNSC | p < 0.001 | LUSC | p < 0.001 | UCEC | p = 0.328 |


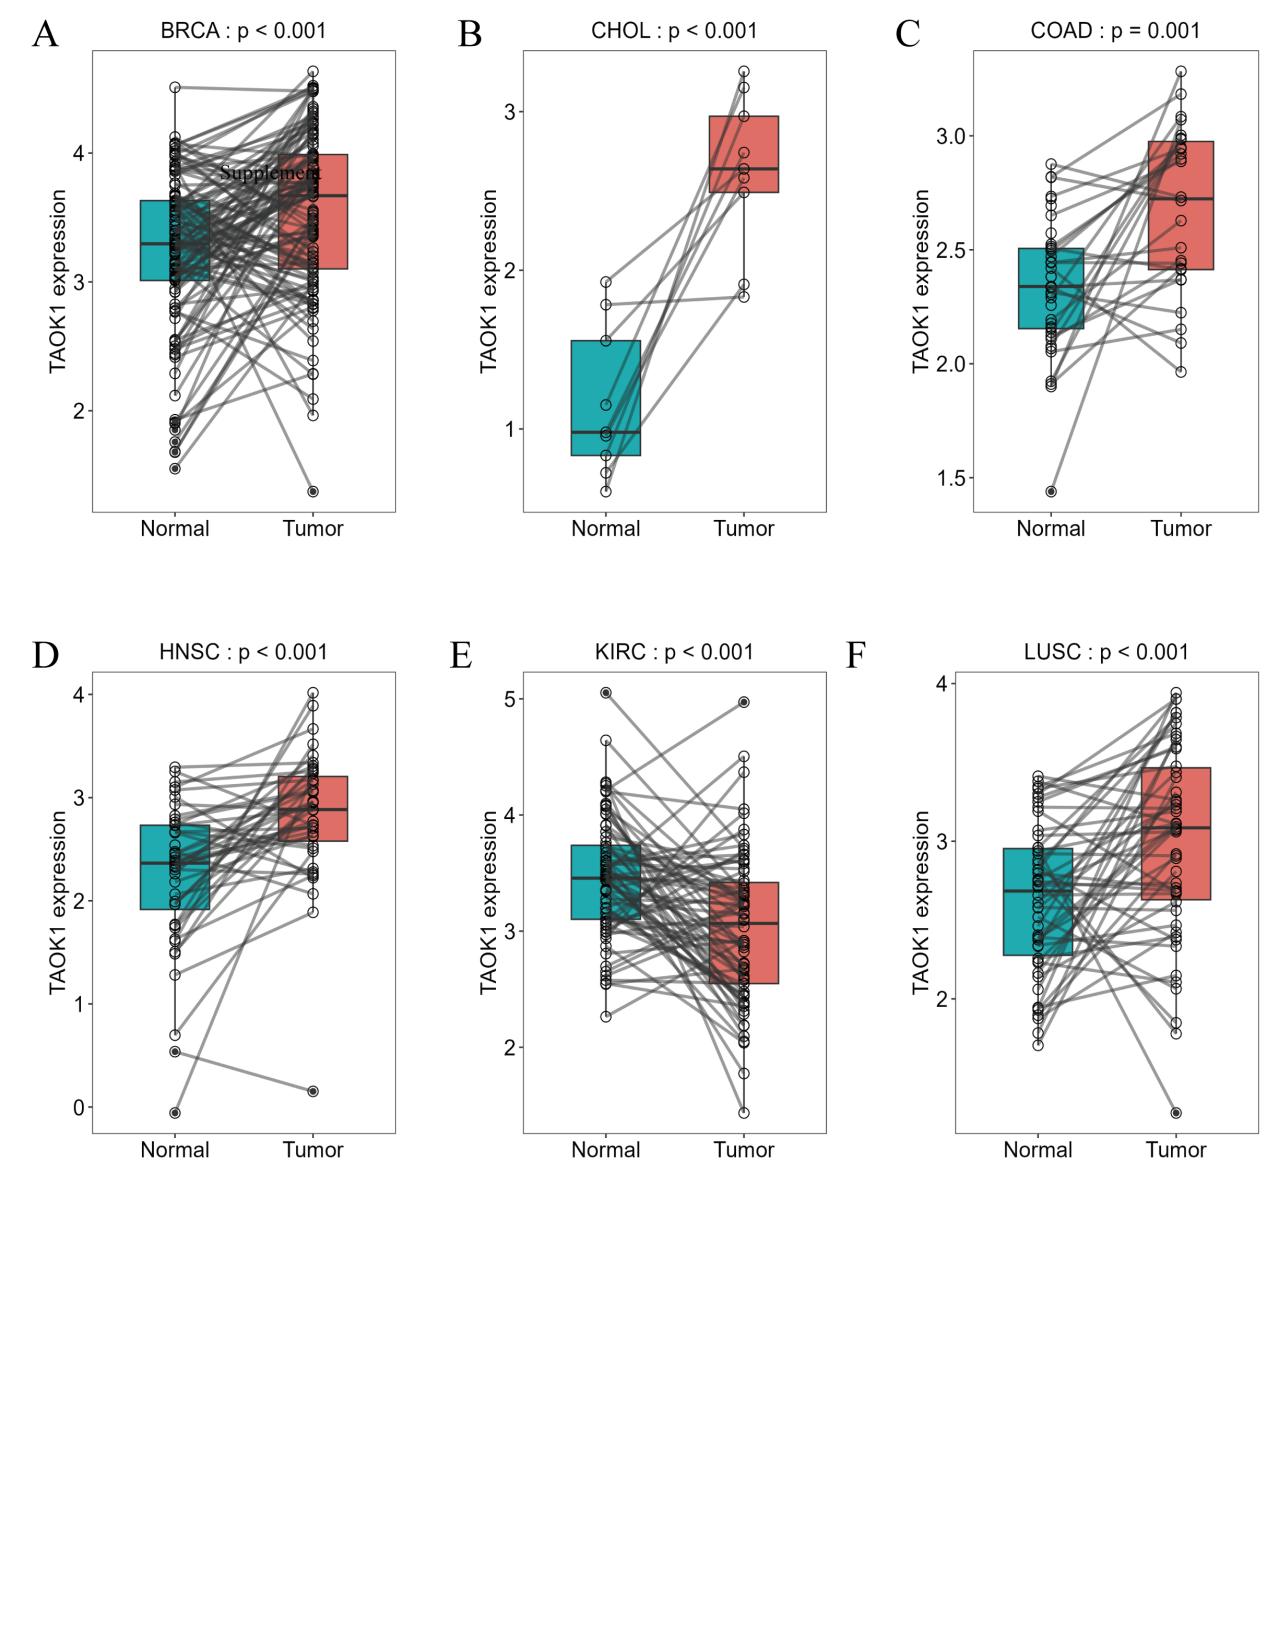


Supplement Figure 1 Results of six paired t-tests including BRCA (A); CHOL (B); COAD (C); HNSC (D); KIRC (E); LUSC (F).


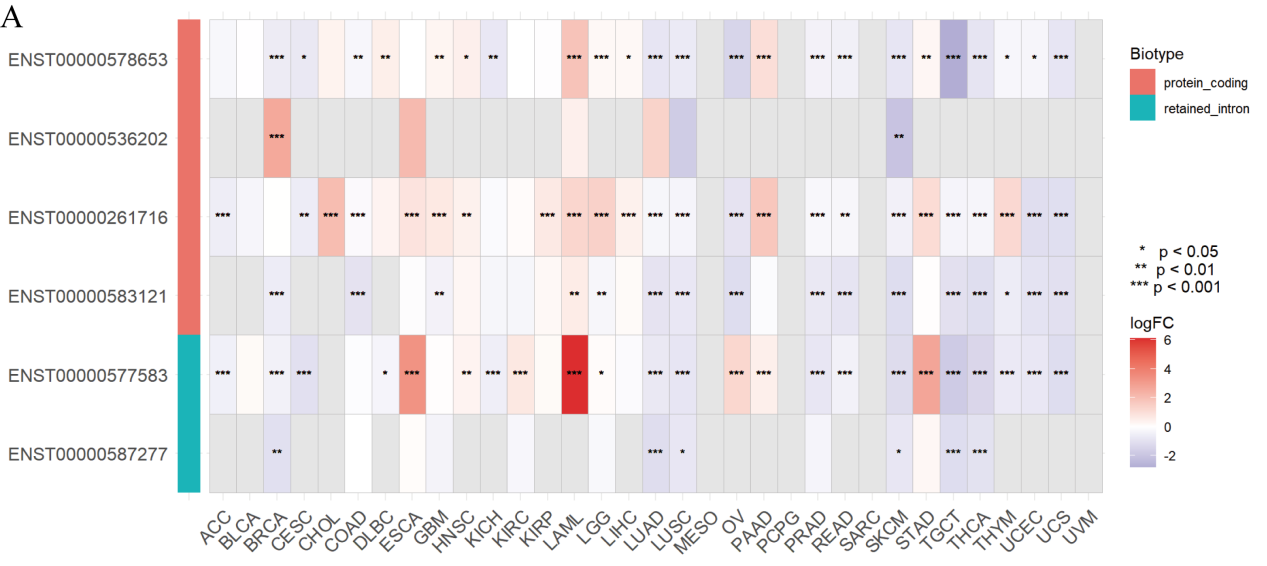


Supplement Figure 2 (A) The expression correlation of TAOK1 transcripts across different tumor types based on the TCGA and GTEx databases. * P < 0.05; ** P < 0.01; *** P < 0.001.


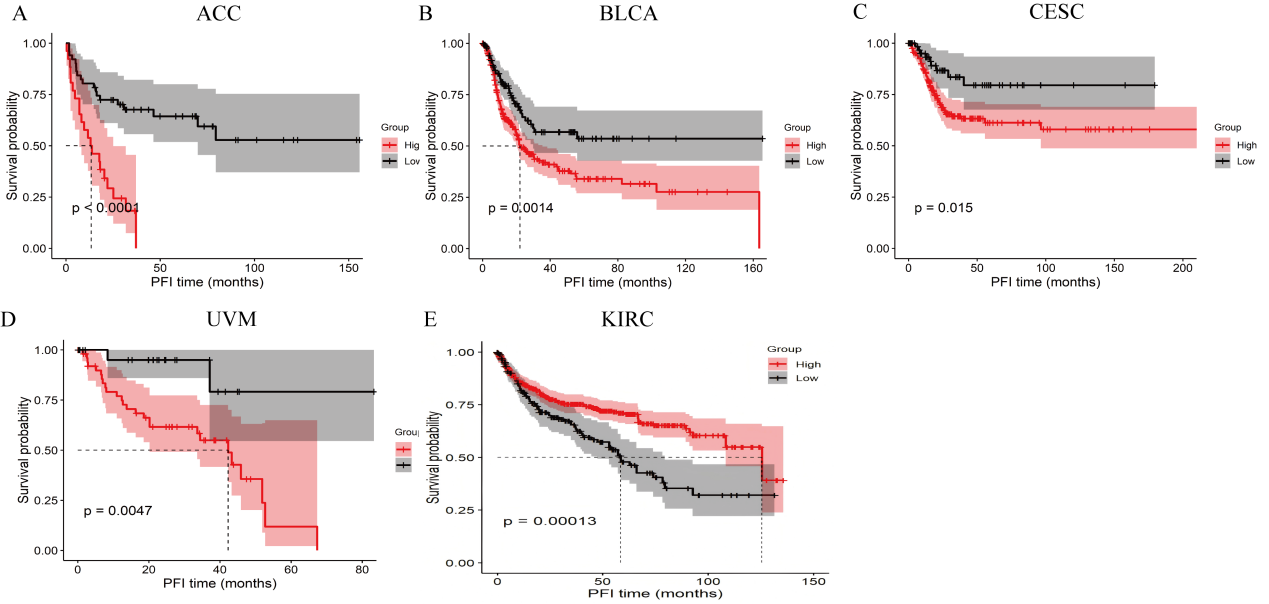
Supplement Figure 3 PFI-based Kaplan-Meier Analysis results include ACC (A); BLCA (B); CESC (C); UVM (D); KIRC (E).


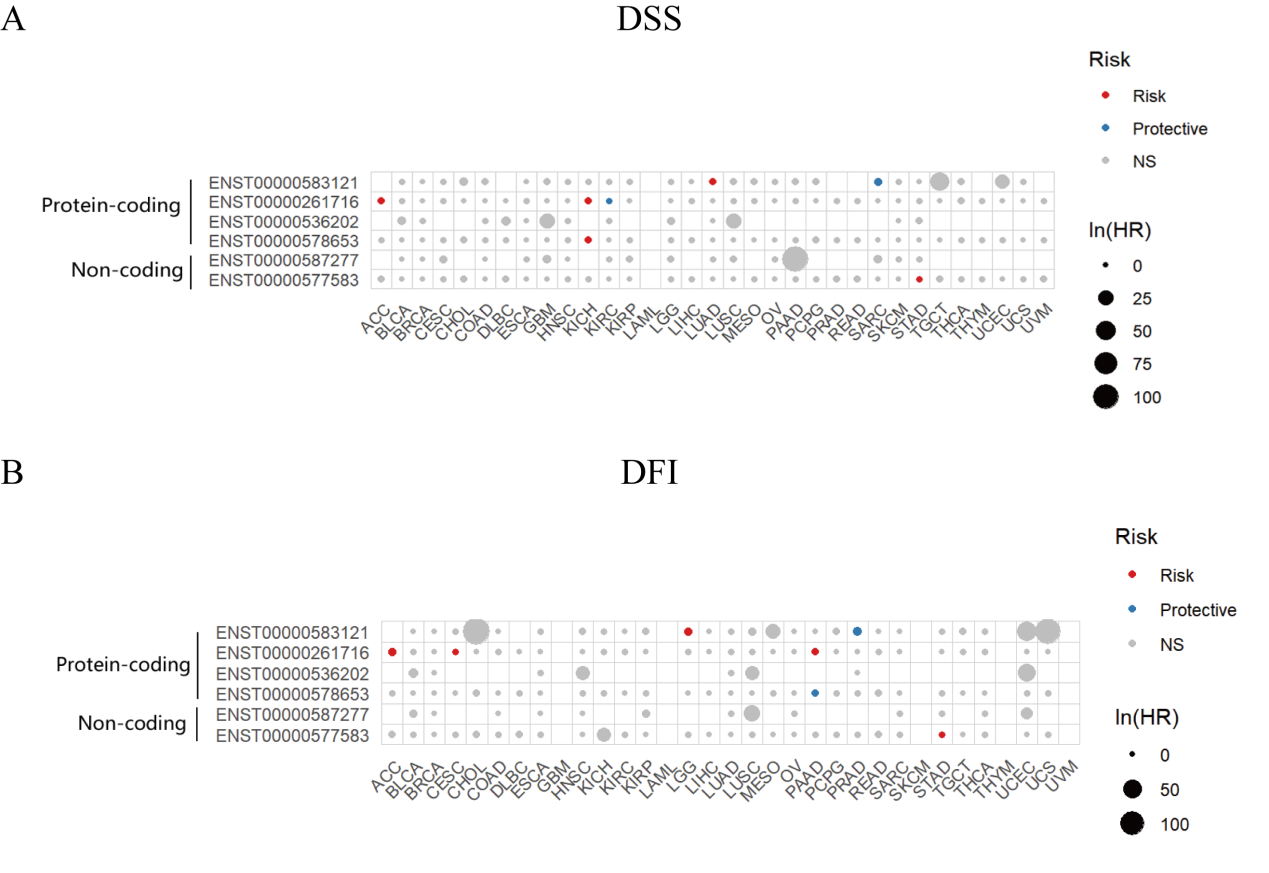
Supplement Figure 4 (A-B) Analysis of DSS and DFI on Six Transcripts of TAOK1.


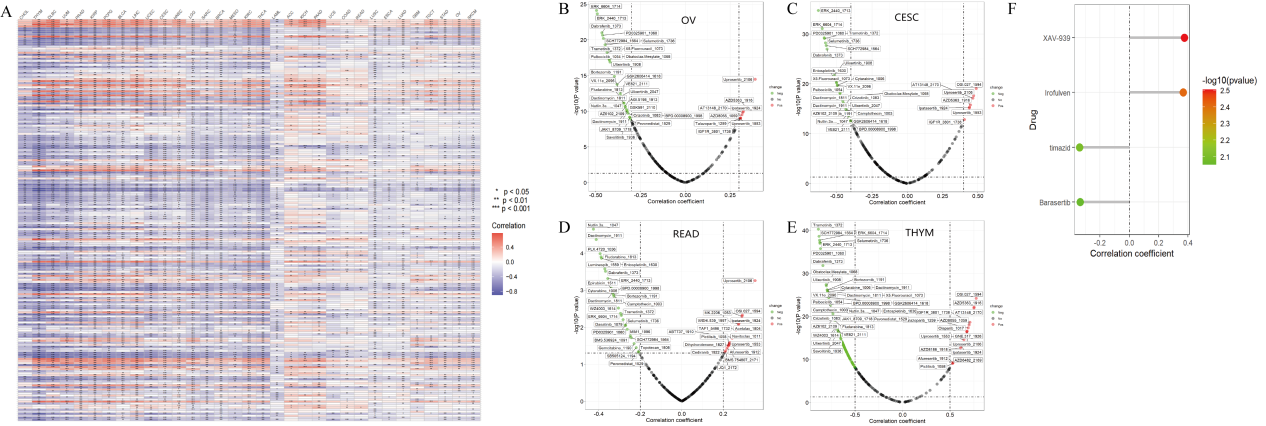
Supplement Figure 5 Correlation analysis between TAOK1 expression and the sensitivity of antitumor drugs. (A)Heatmap visually represents this correlation across various tumors from the "oncoPredict" R package. Correlation coefficients are depicted through a color gradient from purple to red. Scatter plots demonstrate the results of correlation between TAOK1 and antitumor drug sensitivity in specific cancers, such as (B)OV, (C)THYM, (D)CESC and (E)READ. (F) Lollipop plot representing the correlation between TAOK1 expression and antitumor drug sensitivity, based on analysis from the CellMiner database. * P < 0.05; ** P < 0.01; *** P < 0.001.


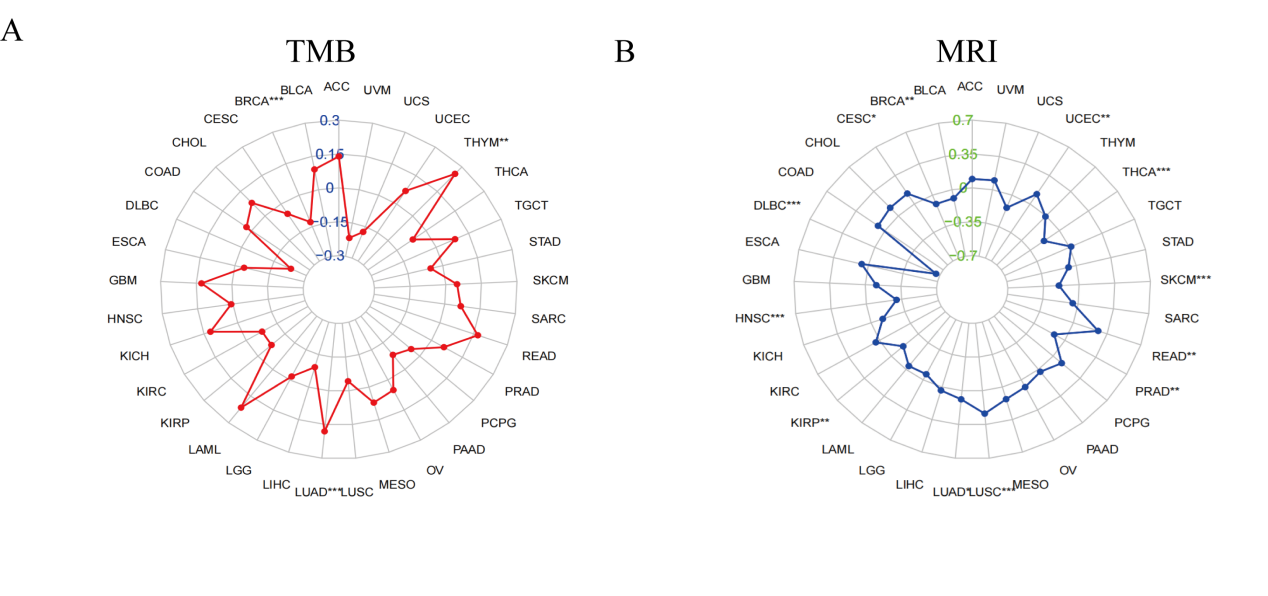
Supplement Figure 6 TMB (A) and MSI (B) of TAOK1.


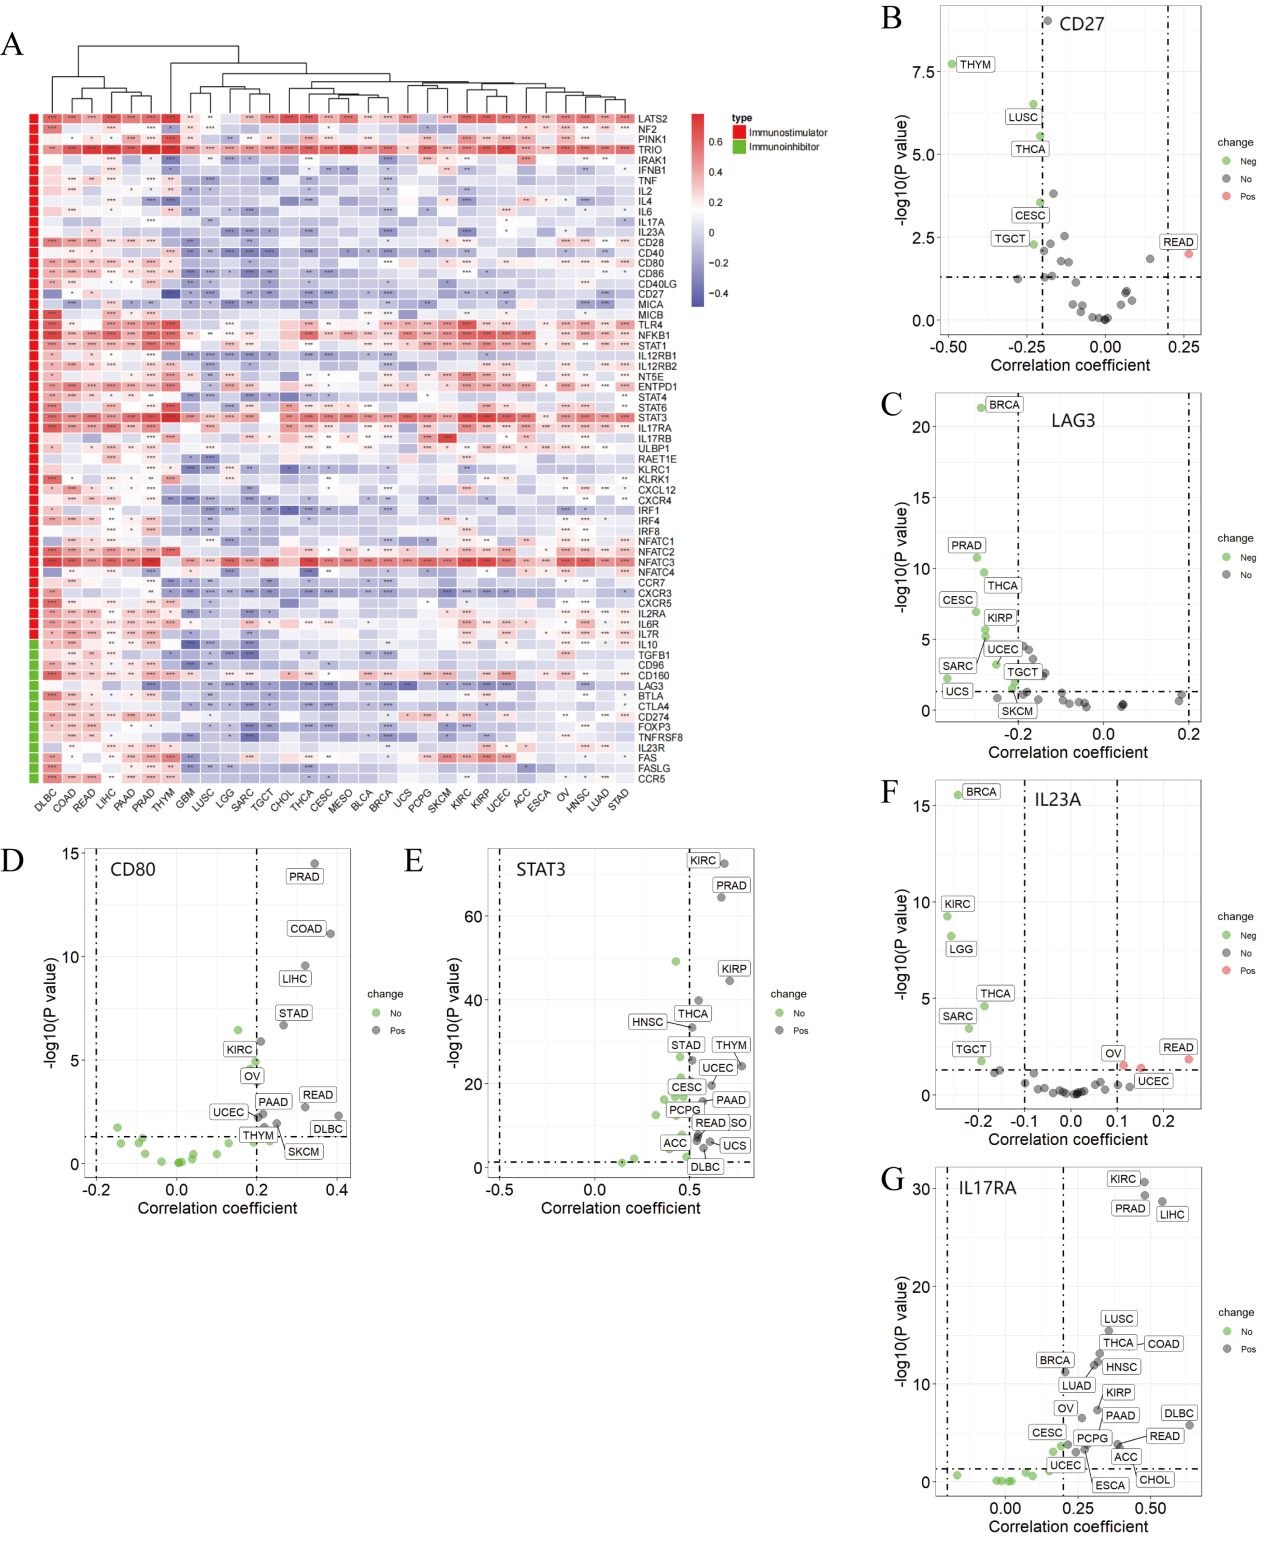


Supplement Figure 7 Correlation analysis between TAOK1 and immune regulatory molecules. The heat map represents the correlation analysis between TAOK1 and immune regulatory factors (A), red: immune stimulator factors; green: immunoinhibitor factors; the correlation analysis between different immune regulatory factors and TAOK1 includes CD27 (B); IL23A (C); LAG3 ( D); CD80 (E); STAT3 (F); IL17RA (G). * P < 0.05; ** P < 0.01; *** P < 0.001.


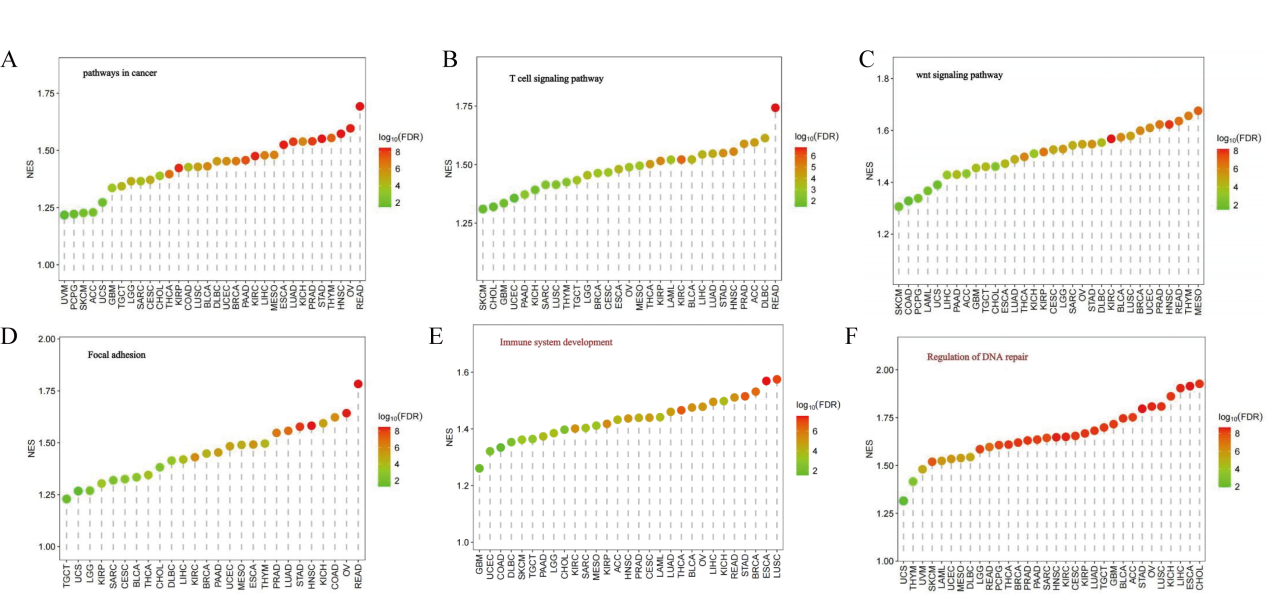


Supplement Figure 8 Correlation analysis of TAOK1 biological information. Lollipop plot showing correlation analysis of TAOK1 with different KEGG signaling pathways (A-C) and biological processes (D-F).


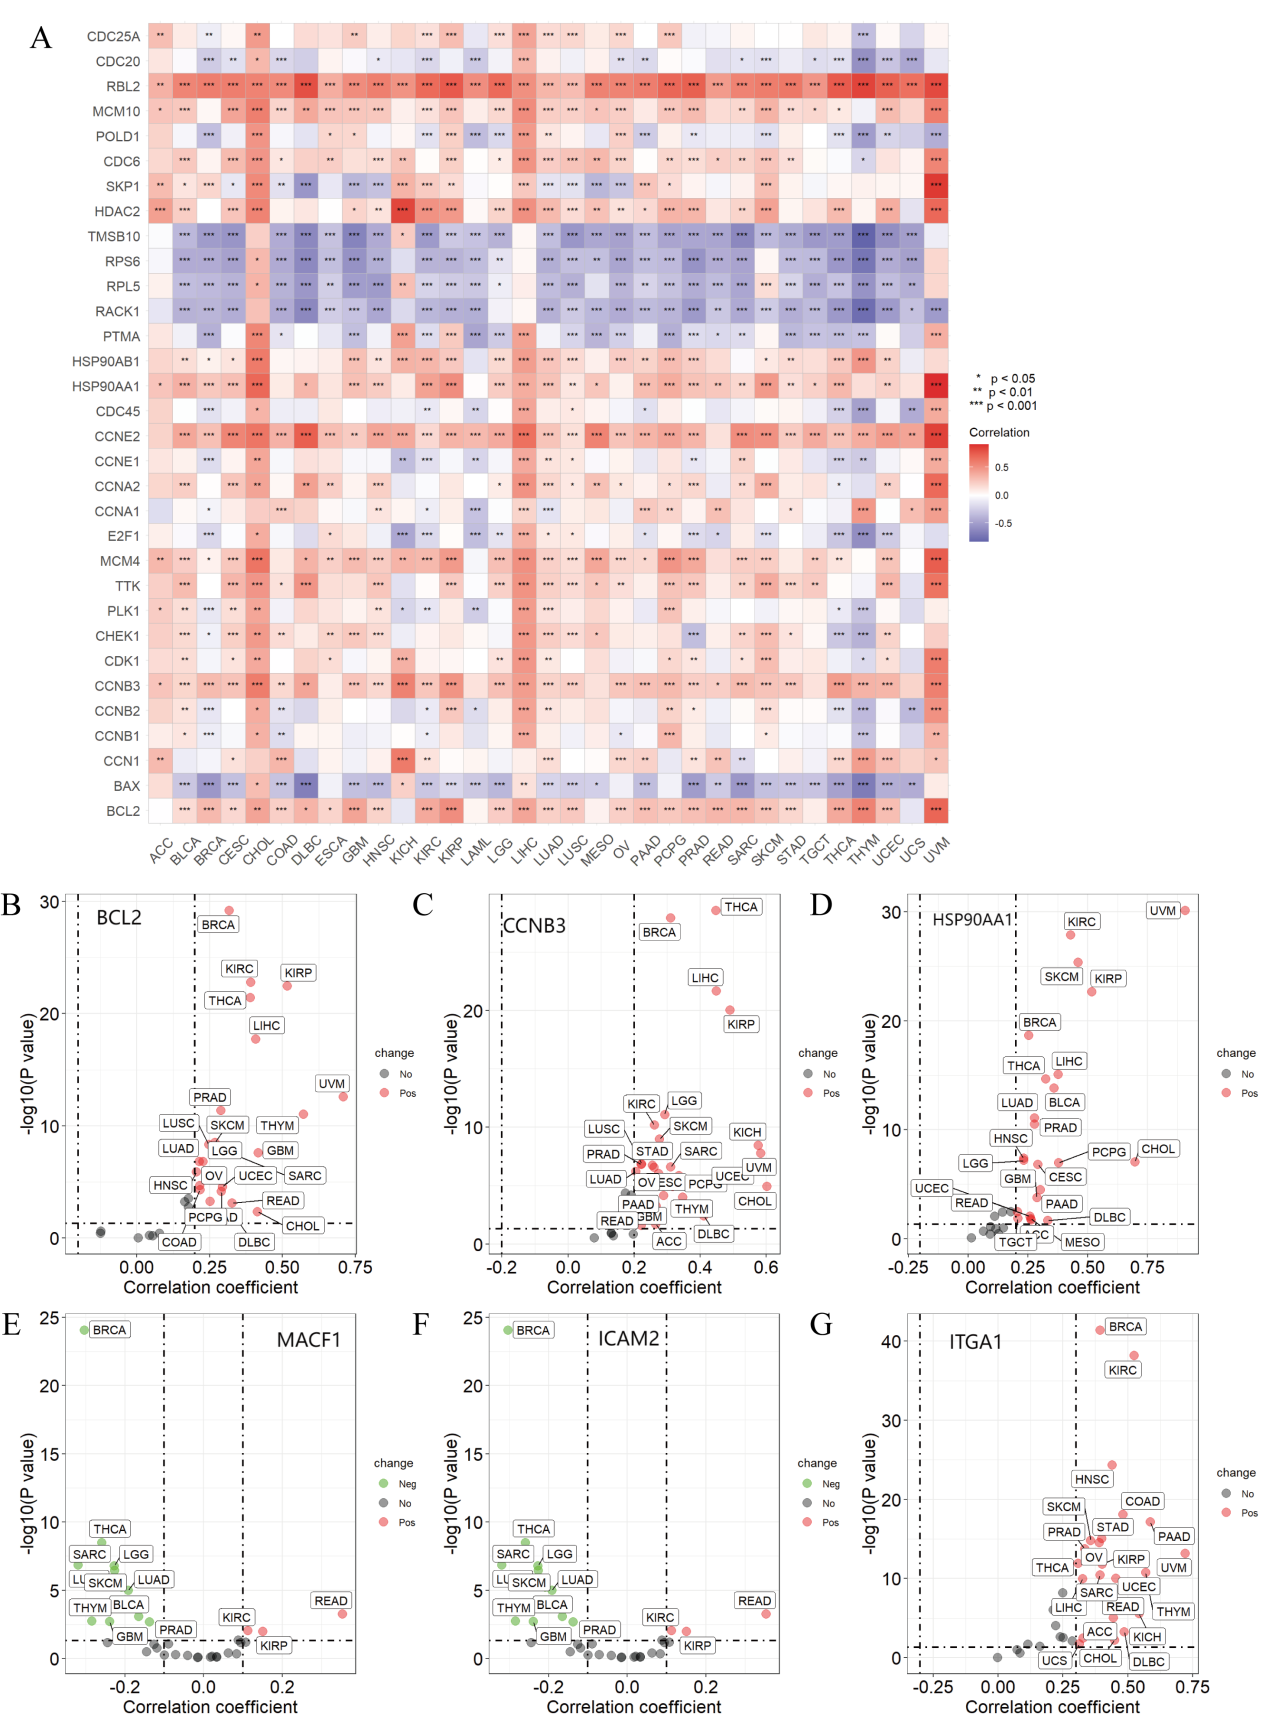


Supplement Figure 9 Correlation analysis between TAOK1 and different genes. (A) Correlation analysis between TAOK1 and cell cycle-related genes. Including BCL2 (B); CCNB3 (C); HSP90AA1 (D); MACF1 (E). Correlation analysis between TAOK1 and cell adhesion genes includes ICAM2 (F); ITGA1 (G). * P < 0.05; ** P < 0.01; *** P < 0.001.


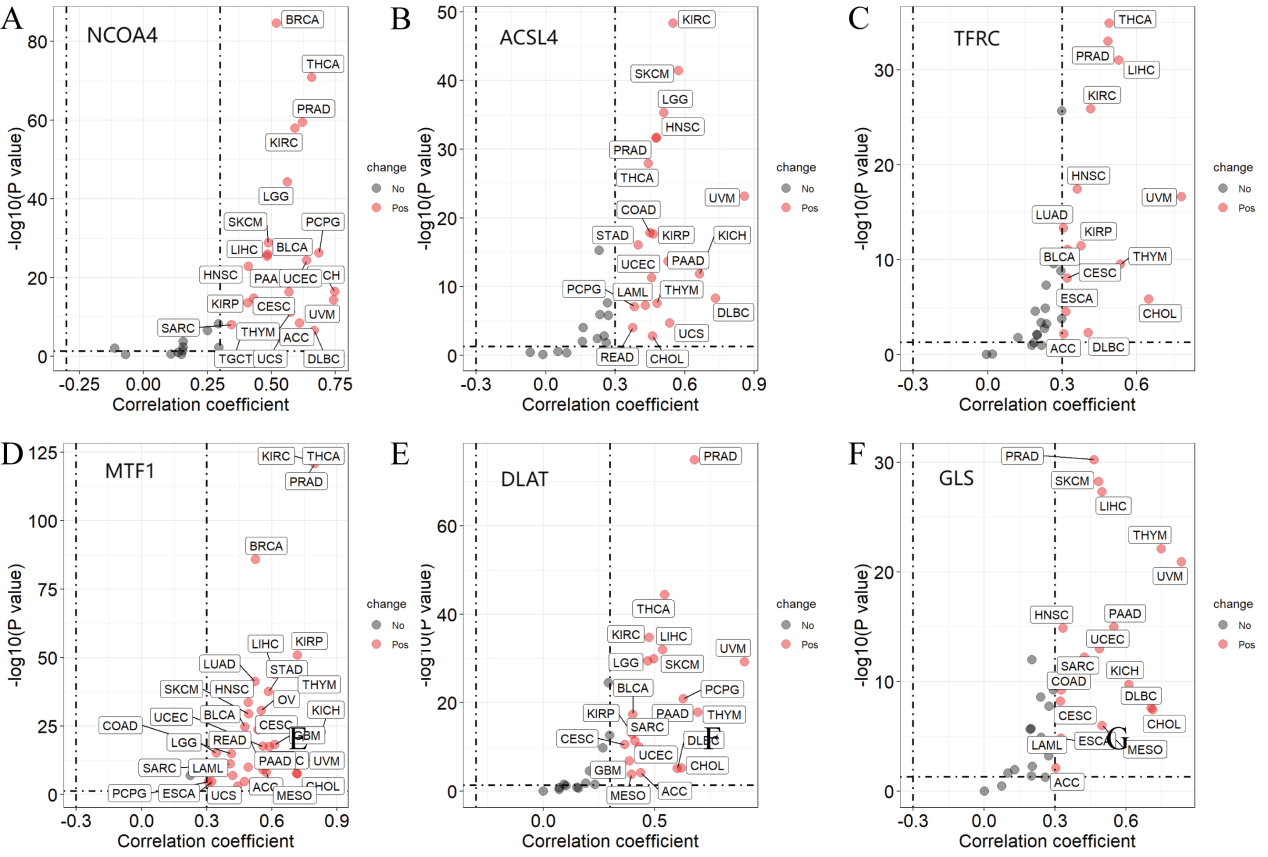


Supplement Figure 10 Correlation analysis of TAOK1 with genes related to ferroptosis (A-C) and cuproptosis (D-F).


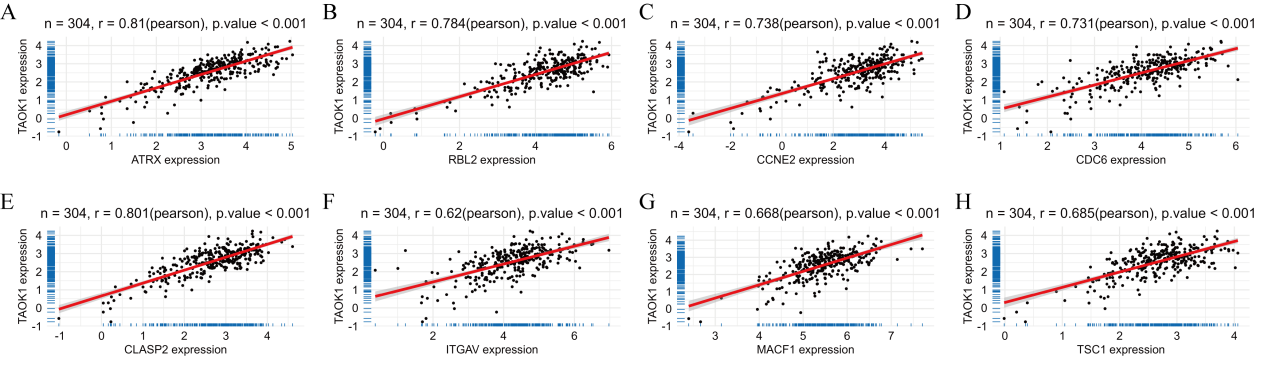


Supplement Figure 11 Correlation analysis between TAOK1 and cell cycle-related and cell adhesion genes in CESC. Including cell cycle-related genes ATRX (A), RBL2 (B), CCNE2 (C), CDC6 (D); cell adhesion genes CLASP2 (E), MACF1 (F), ITGAV (G), TSC1 (H).


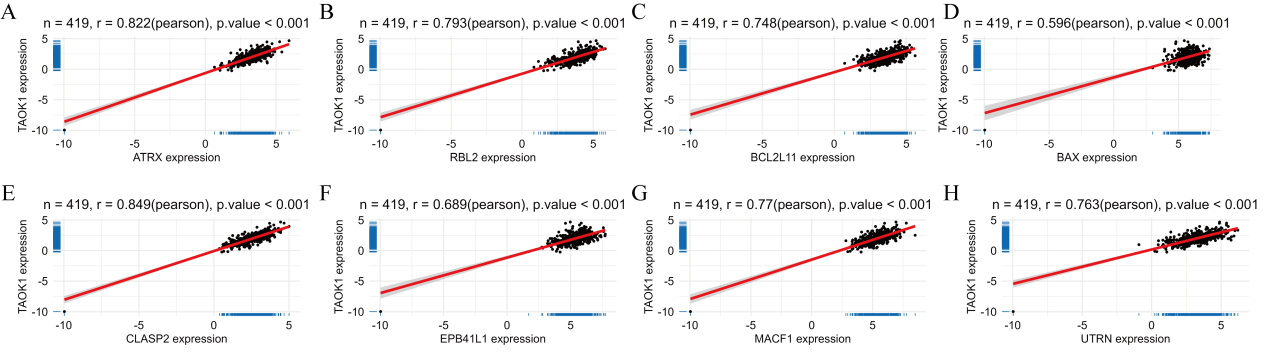


Supplement Figure 12 Correlation analysis between TAOK1 and cell cycle related genes and cell adhesion genes in OV. Including cell cycle-related genes: ATRX (A), RBL2 (B), BCL2L11 (C), BAX (D); cell adhesion genes CLASP2 (E), EPB41L1 (F), MACF1 (G), UTRN (H).


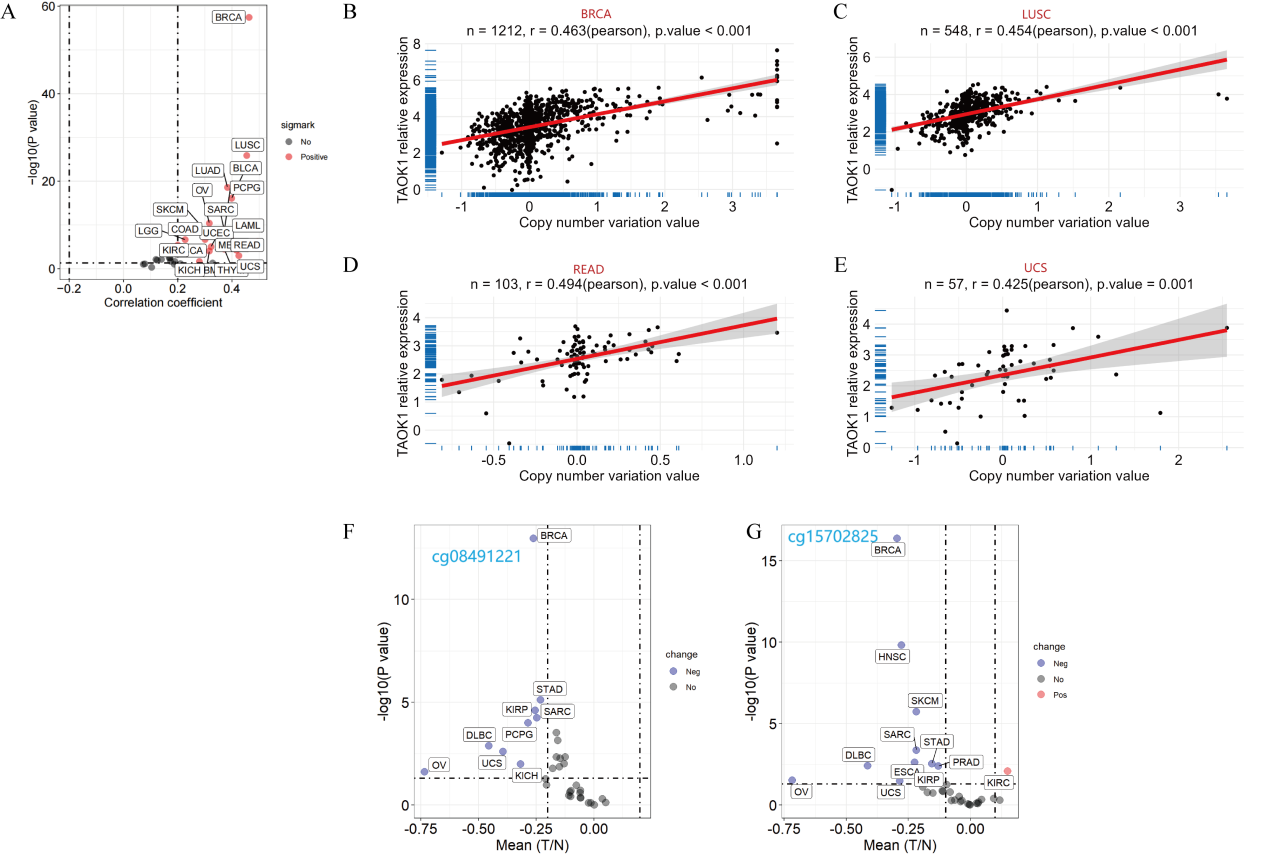


Supplementary Figure 13 Studies of TAOK1 copy number variation. (A) Correlation analysis of TAOK1 copy number variants in pan-cancer TAOK1. Red represents positive correlation and gray represents no correlation. Correlation analyses in individual tumors included BRCA (B), LUSC (C), READ (D), and UCS (E). Student's t-test results for individual methylation sites (F) cg08491221 and (G) cg15702825 in normal and tumor samples from different tumor types.


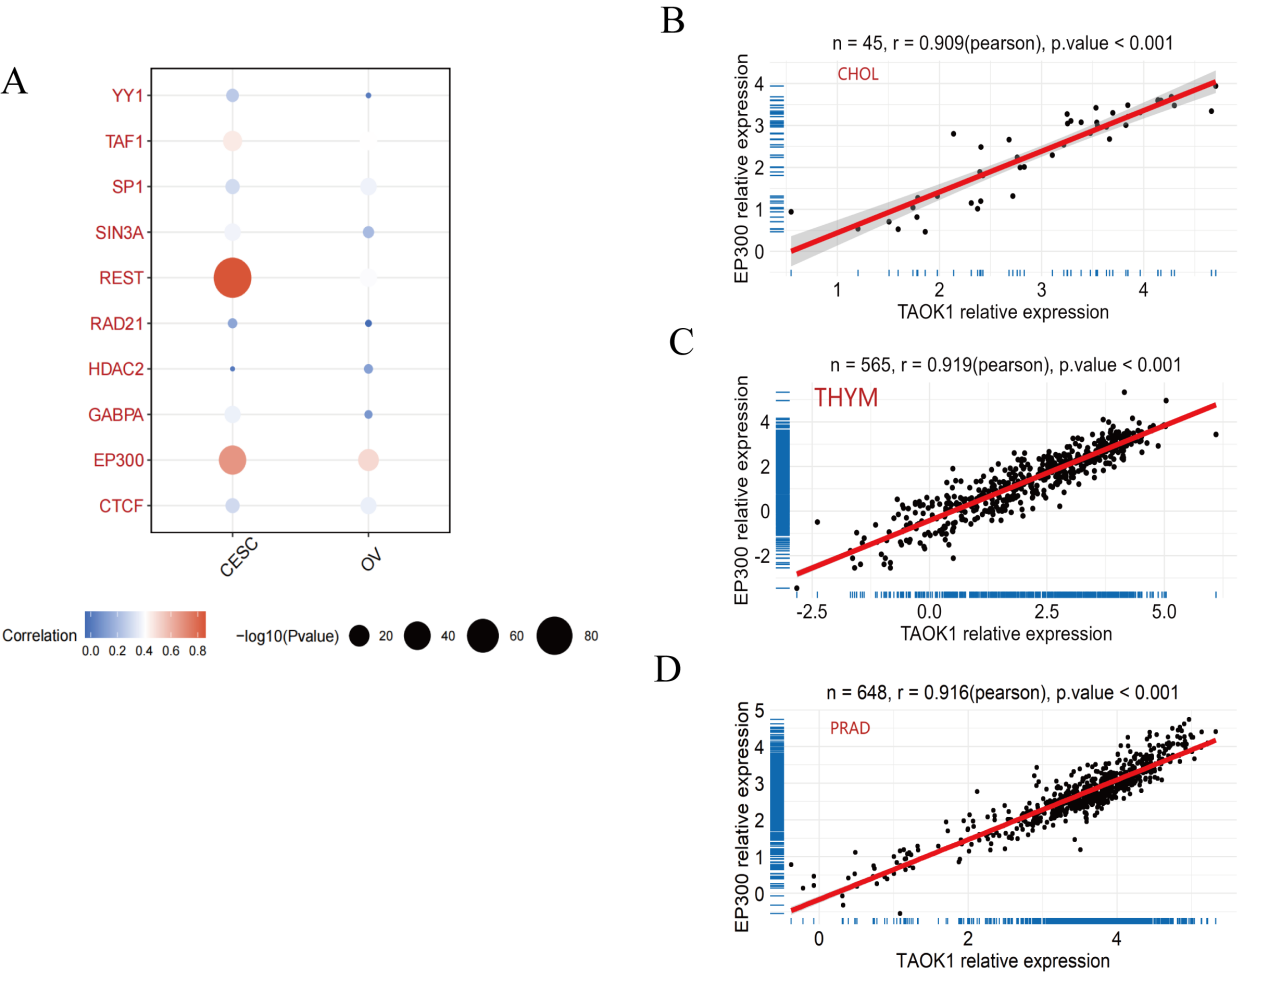


Supplement Figure 14 Correlation analysis of TAOK1 with the transcription factor EP300. (A) Correlation analysis of TAOK1 with ten transcription factors in CESC and OV. Prostate Adenocarcinoma (PRAD) (C), and Cholangiocarcinoma (CHOL) (D).
